# Supplementary material for: Enhanced photocatalytic activity of BiVO4 coupled with iron-based complexes for water oxidation under visible light irradiation
Source: Royal Society of Chemistry journal article supplement (doi:10.1039/c8cc09807g), 2019-01-01
Supplement: c8cc09807g1.pdf [file c8cc09807g1.pdf]

## Supporting Information

### **Enhanced photocatalytic activity of BiVO<sub>4</sub> coupled with iron-based complexes for water oxidation under visible light irradiation**

Xiangming Liang<sup>a</sup>, Junqi Lin<sup>a</sup>, Xiaohu Cao<sup>a</sup>, Wanjun Sun<sup>a</sup>, Junyi Yang<sup>a</sup>, Baochun Ma<sup>a\*</sup> and Yong Ding<sup>a,b\*</sup>

<sup>a</sup> *State Key Laboratory of Applied Organic Chemistry, Key Laboratory of Nonferrous Metal Chemistry and Resources Utilization of Gansu Province, College of Chemistry and Chemical Engineering, Lanzhou University, Lanzhou 730000, China. E-mail: dingyong1@lzu.edu.cn*

<sup>b</sup> *State Key Laboratory for Oxo Synthesis and Selective Oxidation, Lanzhou Institute of Chemical Physics, Chinese Academy of Sciences, Lanzhou 730000, China*

\* To whom correspondence should be addressed.

E-mail addresses: mabaochun@lzu.edu.cn; dingyong1@lzu.edu.cn

### Oxygen evolution yield (O<sub>2</sub> yield) calculation

The oxygen evolution yield (O<sub>2</sub> yield) were determined for the photocatalytic water oxidation under the following conditions: 100 mW/cm<sup>2</sup> under illumination at 420 nm; 25 µM Fe complexes, 50.0 mg BiVO<sub>4</sub>, 5.0 mM NaIO<sub>3</sub>, 15 mL acetate buffer (0.2 M, pH=4.0); total reaction volume is 15 mL and overall volume is ~32 mL; vigorous agitation using a magnetic stirrer.

#### Pure BiVO<sub>4</sub> system (reaction time is 20 h):

$$\begin{aligned}\text{O}_2 \text{ yield} &= \frac{\text{mole of detected O}_2 \text{ evolution}}{\text{mole of theoretic O}_2 \text{ evolution}} \times 100\% \\ &= 4 \times \frac{\text{mole of O}_2 \text{ evolution}}{6 \times \text{mole of NaIO}_3} \times 100\% \\ &= 4 \times \frac{14.4 \mu\text{mol}}{6 \times 5 \text{ mM} \times 15 \text{ ml}} \times 100\% \\ &= 12.8\%\end{aligned}$$

#### Addition complex 2 into BiVO<sub>4</sub> system (reaction time is 20 h):

$$\begin{aligned}\text{O}_2 \text{ yield} &= \frac{\text{mole of detected O}_2 \text{ evolution}}{\text{mole of theoretic O}_2 \text{ evolution}} \times 100\% \\ &= 4 \times \frac{\text{mole of O}_2 \text{ evolution}}{6 \times \text{mole of NaIO}_3} \times 100\% \\ &= 4 \times \frac{111.5 \mu\text{mol}}{6 \times 5 \text{ mM} \times 15 \text{ ml}} \times 100\% \\ &= 99.1\%\end{aligned}$$

### Apparent quantum efficiency (AQE)

The apparent quantum efficiency (AQE) was calculated from the ration of the number of reacted electrons during oxygen evolution (equivalent to n<sub>O<sub>2</sub></sub>) to the number of incident photons n<sub>p</sub> as following, where t is the irradiation time (s), S is the effective light irradiation area (m<sup>2</sup>), and Q is the photon flux of the incident light (µmol (photons) m<sup>-2</sup> s<sup>-1</sup>).

#### Addition Fe complexes into BiVO<sub>4</sub> system:

$$n_p = t \times S \times Q = 3600 \text{ s} \times \pi \times 0.015 \times 0.0125 \times 46 \mu\text{mol m}^{-2} \text{ s}^{-1} = 97.497 \mu\text{mol}$$

$$\begin{aligned}\text{AQE} &= \frac{\text{number of reacted electrons}}{\text{number of incident photons}} \times 100\% \\ &= \frac{4 \times n_{\text{O}_2}}{n_p} \times 100\% \\ &= \frac{4 \times 10.8}{97.497} \times 100\%\end{aligned}$$

$$= 44.3 \%$$

#### Pure BiVO<sub>4</sub> system:

$$n_p = t \times S \times Q = 3600 \text{ s} \times \pi \times 0.015 \times 0.0125 \times 46 \mu\text{mol m}^{-2} \text{ s}^{-1} = 97.497 \mu\text{mol}$$

$$\begin{aligned} \text{AQE} &= \frac{\text{number of reacted electrons}}{\text{number of incident photons}} \times 100\% \\ &= \frac{4 \times n_{\text{O}_2}}{n_p} \times 100\% \\ &= \frac{4 \times 1.1}{97.497} \times 100\% \\ &= 4.5 \% \end{aligned}$$

#### Ligand Synthesis.

The synthesis of ligand TPA has been reported previously.<sup>1</sup> To a mixture of 3.12 g (14.7 mmol) of sodium triacetoxyborohydride 0.54 g (5.26 mmol) of 2-(aminomethyl)pyridine stirring in CH<sub>2</sub>Cl<sub>2</sub> (75 mL) was added 1.00 mL (10.5 mmol) of pyridine-2-carboxaldehyde. Upon completion of addition, stirring was continued for a further 18 h. Subsequently, a saturated aqueous sodium hydrogen carbonate solution was added, and after 15 min of stirring, an extraction of the mixture using ethyl acetate was performed. The organic fraction was dried (Na<sub>2</sub>SO<sub>4</sub>), and the solvent removed. The residue was extracted several times with small quantities of petroleum ether; the extracts were combined and the solvent removed to give TPA as a yellow solid (1.1 g, 72.1 % yield).

The synthesis of the ligand H-mpaq.<sup>2</sup> To a CH<sub>3</sub>CN solution (50 mL) of 8-aminoquinoline (2.5 g, 17.4 mmol) and Na<sub>2</sub>CO<sub>3</sub> (2.2 g, 20.8 mmol), bromoacetyl bromide (4.2 g 20.8 mmol) was slowly added under N<sub>2</sub>, and the resulting mixture was stirred for 4.5 h at 0 °C. After removal of Na<sub>2</sub>CO<sub>3</sub> through a Celite 545 pad, the filtrate was evaporated *in vacuo* to obtain a pale pink powder. The resulting powder was dissolved in CH<sub>3</sub>CN (50 mL), to which Na<sub>2</sub>CO<sub>3</sub> (1.2 g, 11.4 mol) and *N*-methyl-*N*-(2-pyridylmethyl)amine (1.1 g, 9.0 mmol) were added under N<sub>2</sub>. The mixture was stirred overnight at 0 °C. After removal of Na<sub>2</sub>CO<sub>3</sub> by a Celite 545 pad, the filtrate was evaporated *in vacuo* to obtain a viscous yellow oil. The crude product was purified by a column chromatography (Al<sub>2</sub>O<sub>3</sub>, hexane/ethyl acetate (1/1) to ethyl acetate as eluent). The product was obtained as a yellowish white solid (1.2 g, 41.1% yield).

The synthesis of the ligand N4Py.<sup>3</sup> Picolyl chloride hydrochloride (6.8 g, 41.5 mmol) was added to an aqueous solution of NaOH (5M, 8.3 mL) at 0°C. After stirring for 10 min, this solution was added to bis(2-pyridyl)methylamine (4.13 g, 20.8 mmol) and another portion of aqueous NaOH ( 5 M, 8.3 mL). This solution was allowed to stir for 48 h at 25 °C. and then concentrated HClO<sub>4</sub> was added to precipitate a yellow solid. which was recrystallized from hot water. Treatment of this perchlorate salt with 2.5 M NaOH solution and extraction with dichloromethane yielded the free amine of N4Py (2.8 g, 37.2% yield).

## Complex Synthesis

The synthesis of the  $[(\text{TPA})\text{Fe}(\text{Cl})_2]\text{Cl}$  (**1**).<sup>1</sup> A solution of TPA (200 mg, 0.69 mmol) in 2 mL of MeCN was added to a suspension of  $\text{FeCl}_3$  (112 mg, 0.69 mmol) in 5 mL of MeCN to produce a reddish suspension. After stirring at room temperature for 1 hour, the reaction mixture was filtered to yield a light red solution.  $\text{Et}_2\text{O}$  was added to the filtrate to precipitate the compound as a yellow powder (193 mg, 62% yield). FT-IR spectrum: 1606(S), 1485(m), 1443(s), 1289(m), 1159(m), 1097(m), 1054(m), 1025(s), 910(w), 817(w), 765(s), 731(m). Elemental analysis calculated (%) for  $\text{C}_{18}\text{H}_{18}\text{Cl}_3\text{FeN}_4$ : C, 47.77; H, 4.01; N, 12.38. Found: C, 48.37; H, 4.25; N, 12.70. ESI-MS. Found: 416.04.  $[\text{FeTPACl}_2]^+$ ,  $\text{C}_{18}\text{H}_{18}\text{Cl}_2\text{FeN}_4^+$ ,  $m/z$  416.03.

The synthesis of the  $[\text{Fe}_2(\text{TPA})_2(\mu\text{-O})\text{Cl}_2]\text{Cl}_2$  (**2**).<sup>1</sup> TPA (0.145 mg, 0.5 mmol) was dissolved in 20 mL of MeOH and treated with  $\text{Et}_3\text{N}$  (0.31 mL, 2.25 mmol).  $\text{FeCl}_3 \cdot 6\text{H}_2\text{O}$  (0.135 g, 0.5 mmol) in a small volume (1-2 mL) of MeOH was added to the resulting solution of TPA. To this resultant red solution was added NaOAc (0.034 g, 0.25 mmol). FT-IR spectrum: 1605 (s), 1571 (m), 1485 (m), 1295 (m), 1100 (m), 1053 (m), 1024 (m), 957 (w), 827 (s), 766 (s), 624 (m). Elemental analysis calculated (%) for  $\text{C}_{36}\text{H}_{36}\text{Cl}_4\text{Fe}_2\text{N}_8\text{O}$ : C, 48.79; H, 4.55; N, 12.64; Found: C, 48.67; H, 4.55; N, 12.70. ESI-MS. Found: 813.11;  $[\text{Fe}_2\text{TPA}_2(\mu\text{-O})\text{Cl}_3]^+$ ,  $\text{C}_{36}\text{H}_{36}\text{Cl}_3\text{Fe}_2\text{N}_8\text{O}^+$ ,  $m/z$  813.08.

The synthesis of the  $\text{Fe}(\text{mpaq})\text{Cl}_2$  (**3**).<sup>2</sup> To a solution of H-mpaq (200 mg, 0.65 mmol) in  $\text{CH}_3\text{OH}$  (2 mL) in a glass vial,  $\text{Et}_3\text{N}$  (91  $\mu\text{L}$ , 0.65 mmol) and a solution of  $\text{FeCl}_3$  (130 mg, 0.78 mmol) in  $\text{CH}_3\text{OH}$  (2 mL) were slowly added. The dark green mixture was stirred for 3 hours. The precipitated green crystals were collected by filtration, washed with  $\text{CH}_3\text{OH}$ , and dried in vacuo. The products was isolated as a dark green powder; 240 mg (81% yield). FT-IR spectrum: 1629 (s), 1590 (m), 1573 (m), 1503 (m), 1467 (m), 1387 (s), 1356 (m), 1328 (m), 1306 (m), 1237 (m), 1103 (m), 1022 (m), 966 (m), 824 (m), 783 (m), 770 (m), 758 (m). UV-vis ( $\text{CH}_3\text{CN}$ ): 615 nm, 360 nm. Elemental analysis calculated (%) for  $\text{C}_{18}\text{H}_{19}\text{Cl}_2\text{FeN}_4\text{O}_2$ : C, 48.03; H, 4.25; N, 12.45. Found: C, 48.03; H, 4.02; N, 12.09. ESI-MS. Found: 395.96.  $[\text{Fe}(\text{mpaq})\text{Cl}]^+$ ,  $\text{C}_{18}\text{H}_{17}\text{ClFeN}_4\text{O}^+$ ,  $m/z$  396.04.

The synthesis of the  $[\text{Fe}(\text{N4Py})(\text{CH}_3\text{CN})](\text{ClO}_4)_2$  (**4**).<sup>4</sup>  $\text{Fe}(\text{ClO}_4)_2 \cdot 10\text{H}_2\text{O}$  (0.215 g, 0.403 mmol) has added to a solution of N4Py (0.144 g, 0.392 mmol) in methanol:acetonitrile (1: 1) . The solution was allowed to stir for 5 min. and then was placed in a n ethyl acetate bath The red

crystalline product was collected and washed with ethyl acetate to yield **1** as dark red crystals (0.179 g, 65 % yield). FT-IR spectrum: 1605 (m), 1464 (s), 1447 (m), 1158 (m), 1093 (vs), 914 (m), 765 (s), 624 (s). UV-Vis (acetone): 382, 458. Elemental analysis calculated (%) for  $C_{25}H_{28}Cl_2FeN_6O_{10}$ : C, 42.94; H, 4.04; N, 12.02; Found: C, 43.21; H, 3.76; N, 12.02. ESI-MS. Found: 211.56.  $[Fe(N4Py)]^{2+}$ ,  $C_{23}H_{21}FeN_5^{2+}$ ,  $m/z$  211.56.

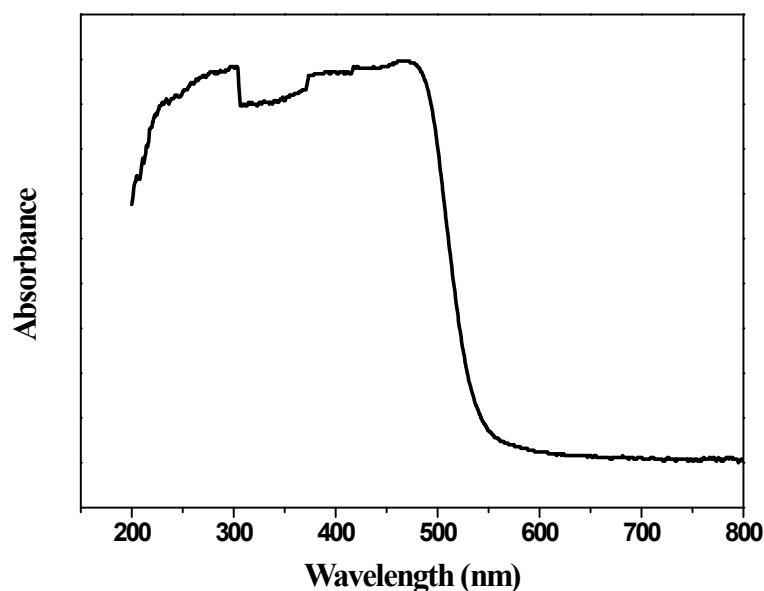

**Fig. S1.** UV-vis diffuse reflectance spectrum of  $BiVO_4$ .

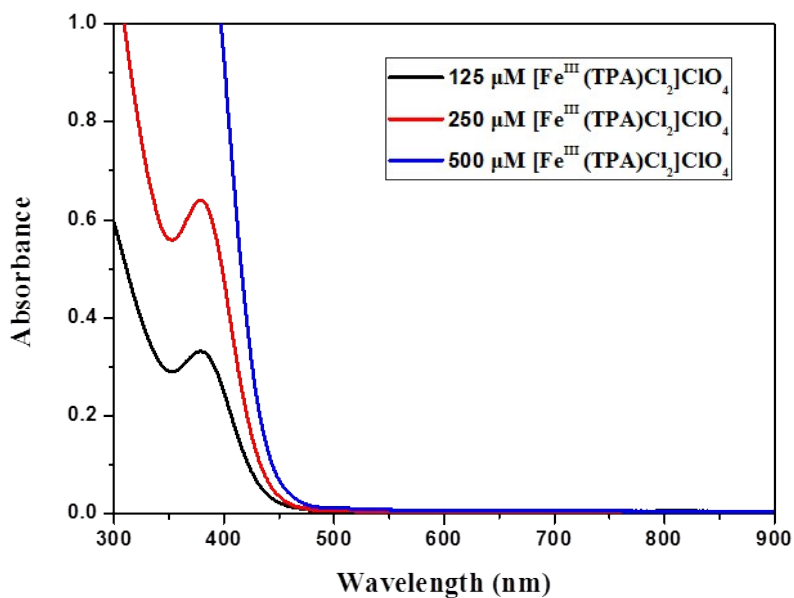

**Fig. S2** UV-vis spectra for **1** at different concentrations: 125, 250, and 500  $\mu M$  in an aqueous solution.

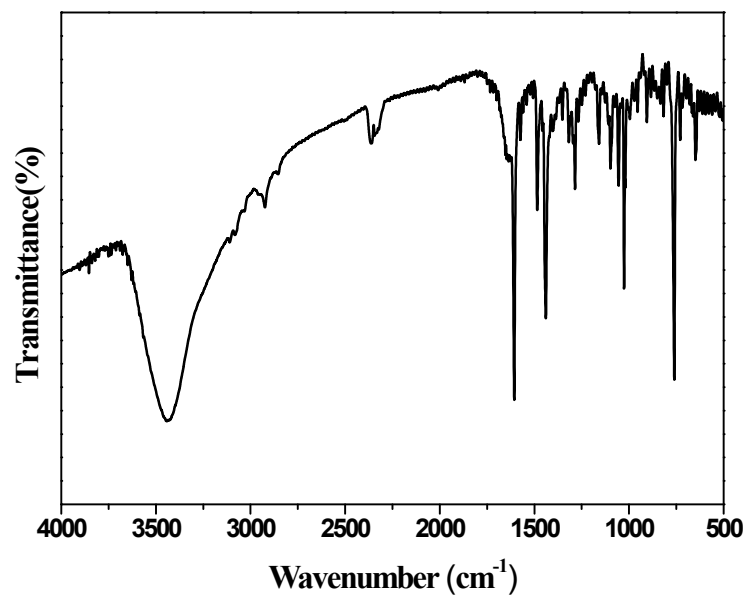

**Fig. S3** FT-IR spectrum of **1** ( $\text{cm}^{-1}$ ): 1606(s), 1485(m), 1443(s), 1289(m), 1159(m), 1097(m), 1054(m), 1025(s), 910(w), 817(w), 765(s), 731(m).

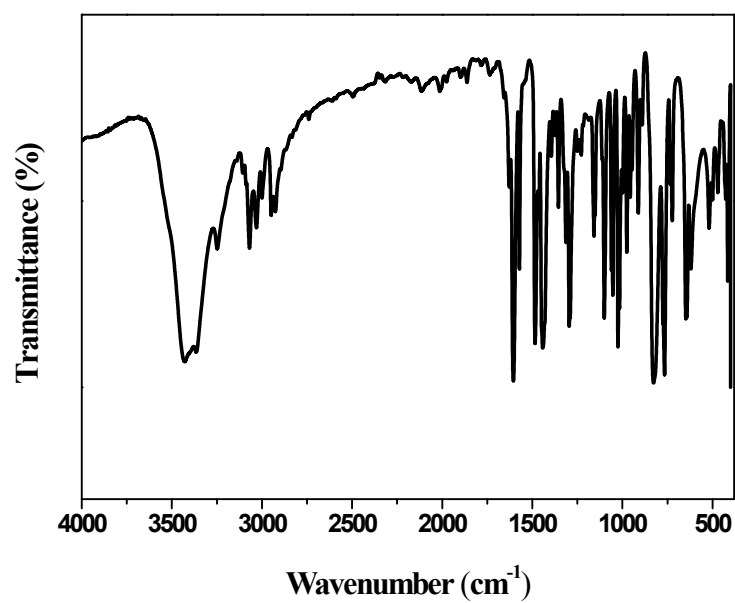

**Fig. S4** FT-IR spectrum of **2** ( $\text{cm}^{-1}$ ): 1605 (s), 1571 (m), 1485 (m), 1295 (m), 1100 (m), 1053 (m), 1024 (m), 957 (w), 827 (s), 766 (s), 624 (m).

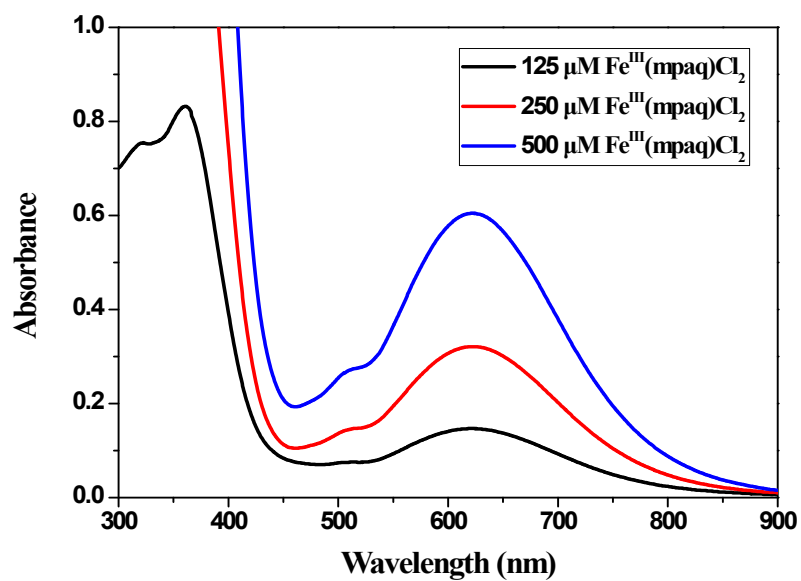

**Fig. S5** UV-vis spectra for **3** at different concentrations: 125, 250, and 500  $\mu\text{M}$  in  $\text{CH}_3\text{CN}$ .

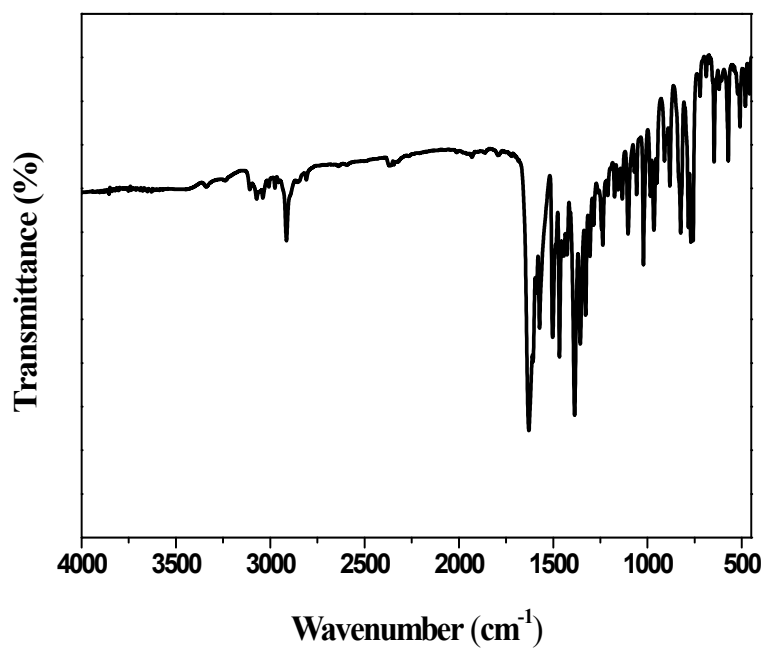

**Fig. S6** FT-IR spectrum of **3** ( $\text{cm}^{-1}$ ): 1629 (s), 1590 (m), 1573 (m), 1503 (m), 1467 (m), 1387 (s), 1356 (m), 1328 (m), 1306 (m), 1237 (m), 1103 (m), 1022 (m), 966 (m), 824 (m), 783 (m), 770 (m), 758 (m).



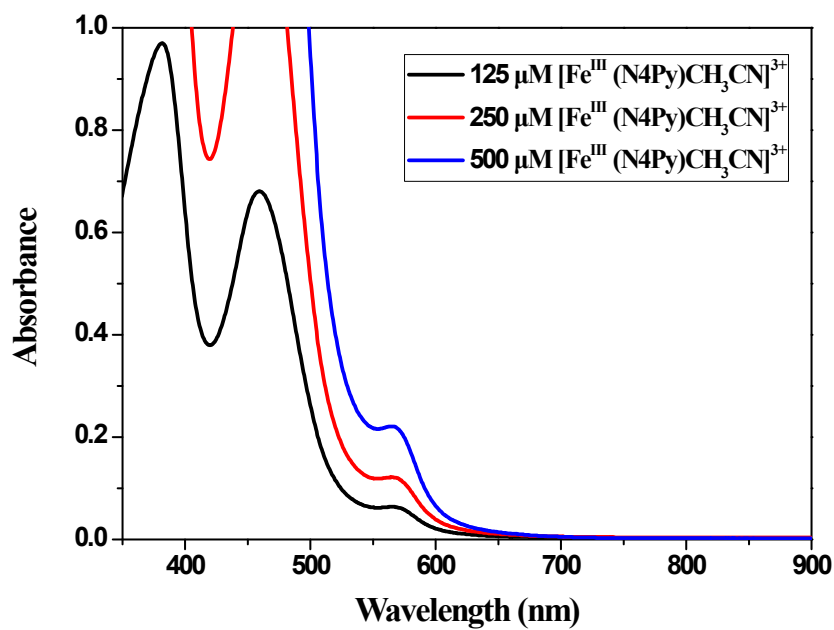

**Fig. S7** UV-vis spectra for **4** at different concentrations: 125, 250, and 500  $\mu\text{M}$  in MeOH.

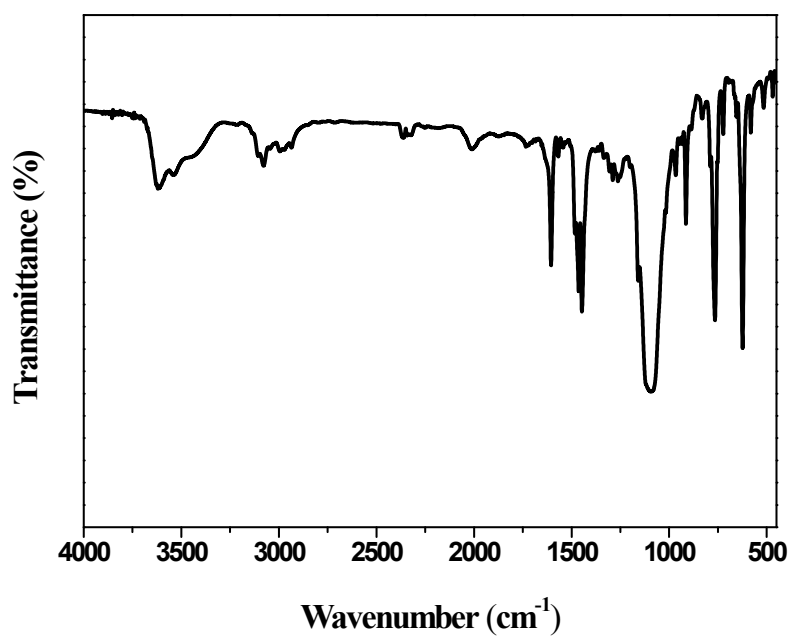

**Fig. S8** FT-IR spectrum of **4** ( $\text{cm}^{-1}$ ): 1605 (m), 1464 (s), 1447 (m), 1158 (m), 1093 (vs), 914 (m), 765 (s), 624 (s).

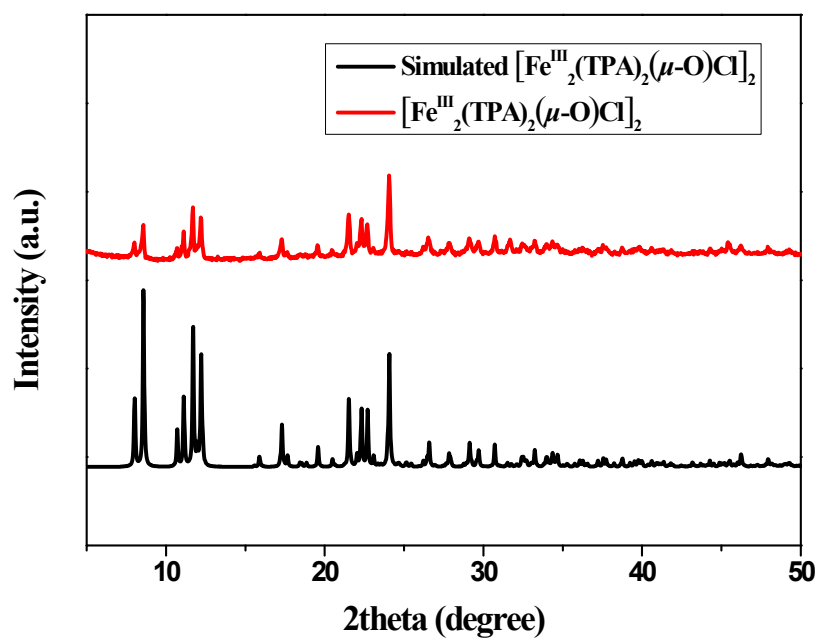

Fig. S9 Measured (red) and simulated (black) powder X-ray diffraction data of **2**.

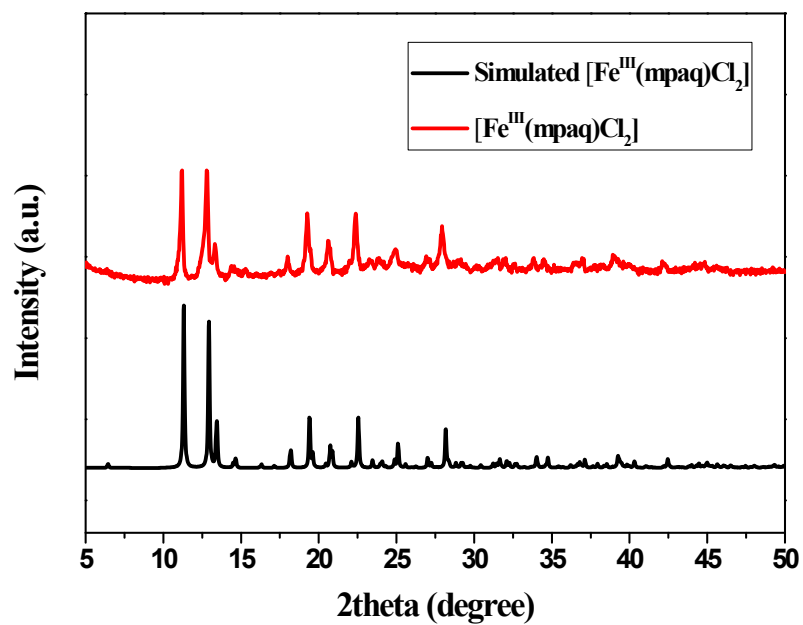

Fig. S10 Measured (red) and simulated (black) powder X-ray diffraction data of **3**.

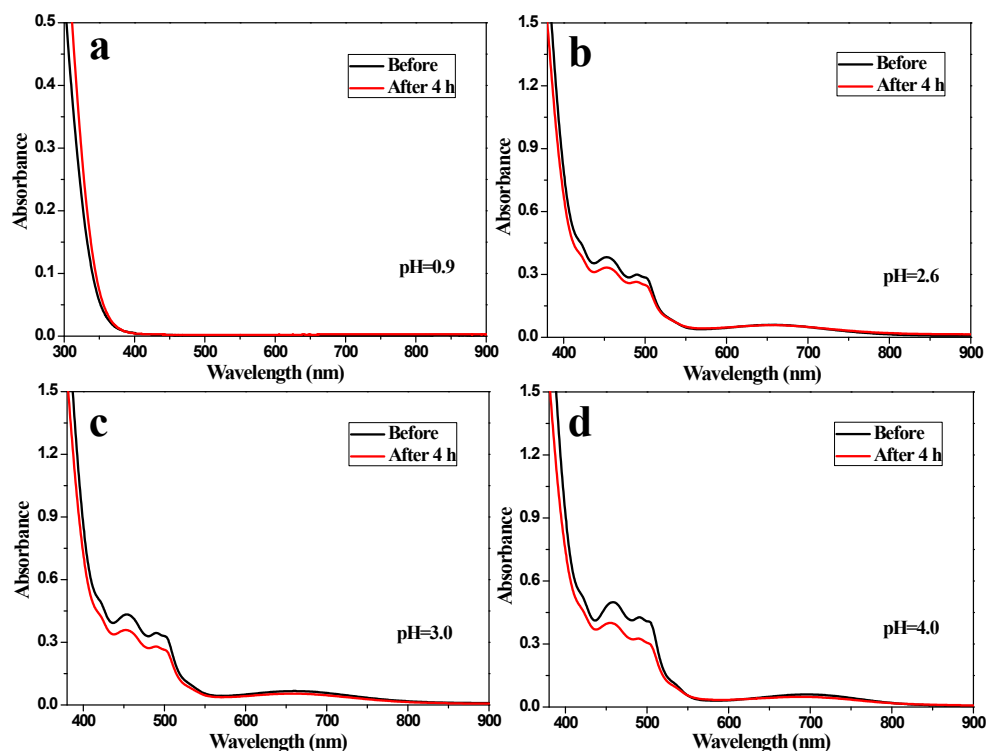

**Fig. S11** UV-vis spectra before the reaction (black) and after the reaction (red), conditions: LED lamp ( $\lambda=420$  nm),  $\text{BiVO}_4$  (50 mg),  $\text{NaIO}_3$  (5 mM) and complex **2** (500  $\mu\text{M}$ ), acetate buffer (pH 4.0, 0.2 M); total reaction volume 15 mL; vigorous agitation using a magnetic stirrer. The solutions are filtered before spectrum measurement.

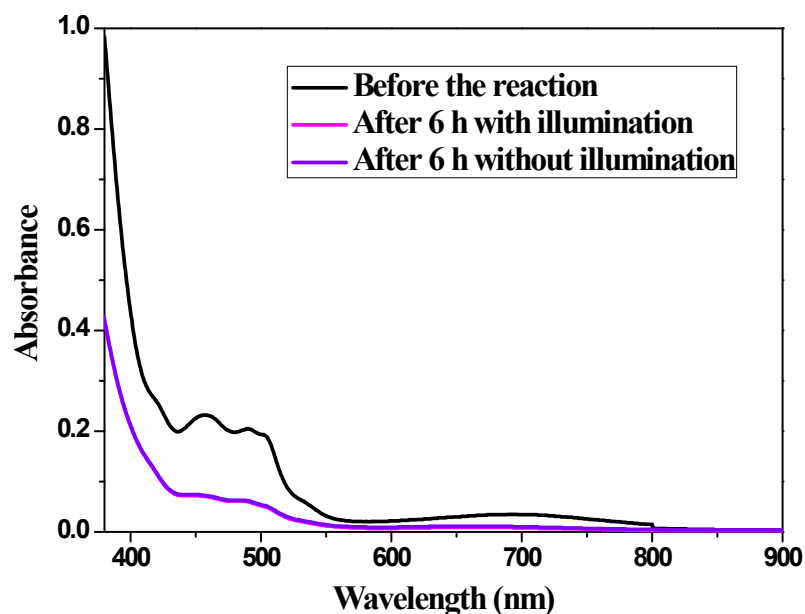

**Fig. S12** UV-vis spectra before the reaction (black), after 6 h reaction with illumination (magenta) and without illumination (violet), conditions: LED lamp ( $\lambda=420$  nm),  $\text{BiVO}_4$  (50 mg),  $\text{NaIO}_3$  (5 mM) and complex **2** (250  $\mu\text{M}$ ), acetate buffer (pH 4.0, 0.2 M); total reaction volume 15 mL; vigorous agitation using a magnetic stirrer. The solutions are filtered before spectrum measurement.

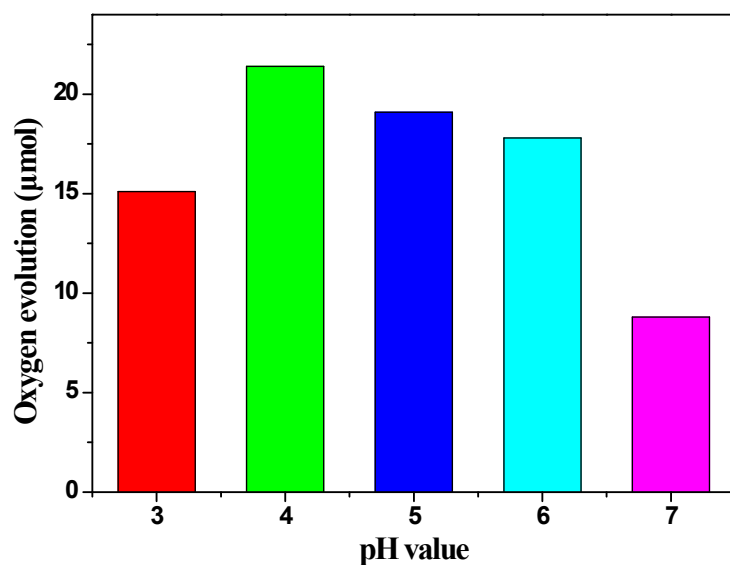

**Fig. S13** Photocatalytic oxygen evolution with the artificial photosynthetic system composed of  $\text{BiVO}_4$  (50 mg) and Fe complex **2** (50  $\mu\text{M}$ ) in acetate buffer (0.2 M) containing  $\text{NaIO}_3$  (5 mM) as a function of pH under visible light irradiation ( $\lambda = 420 \text{ nm}$ ), reaction time is 3 h.

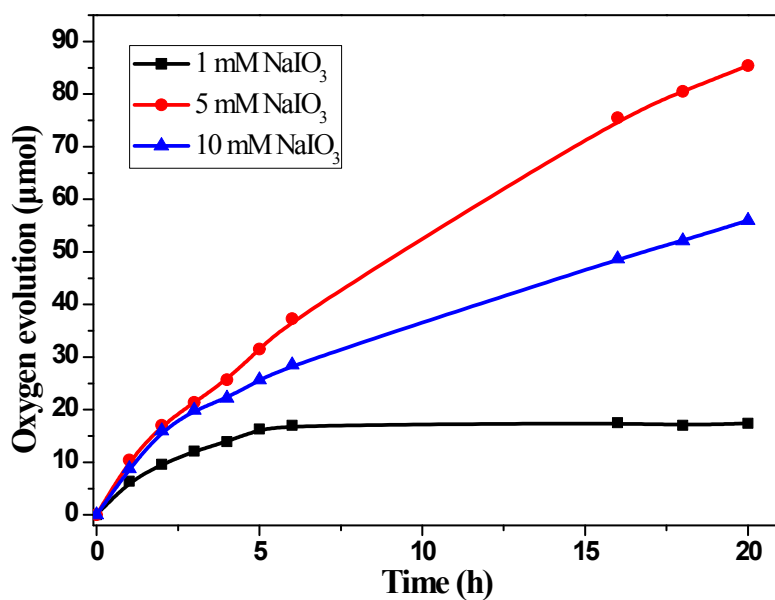

**Fig. S14** Photocatalytic oxygen evolution with the photocatalytic system composed of  $\text{BiVO}_4$  (50 mg) and complex **2** (50  $\mu\text{M}$ ) in acetate buffer (pH 4.0, 0.2 M) containing different  $\text{NaIO}_3$  concentrations under visible light irradiation ( $\lambda = 420 \text{ nm}$ ).

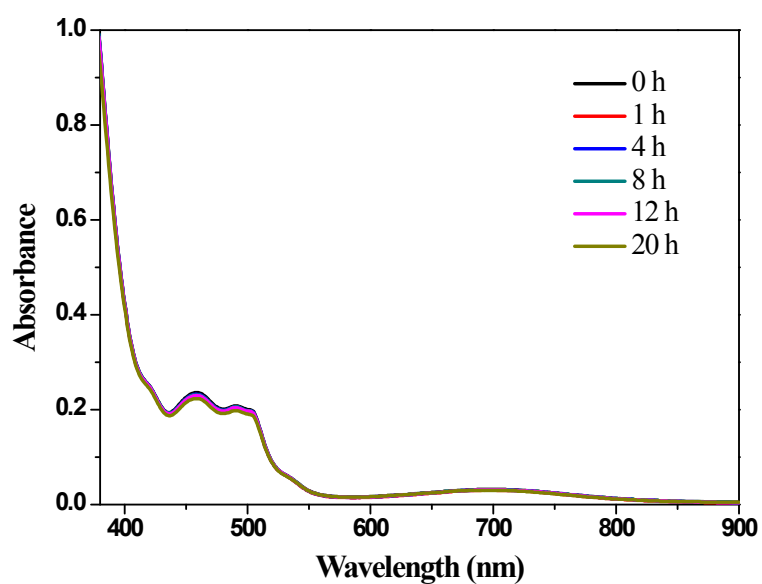

**Fig. S15** Time-dependent UV-vis spectra of 250  $\mu\text{M}$  **2** in acetate buffer (pH 4.0, 0.2 M).

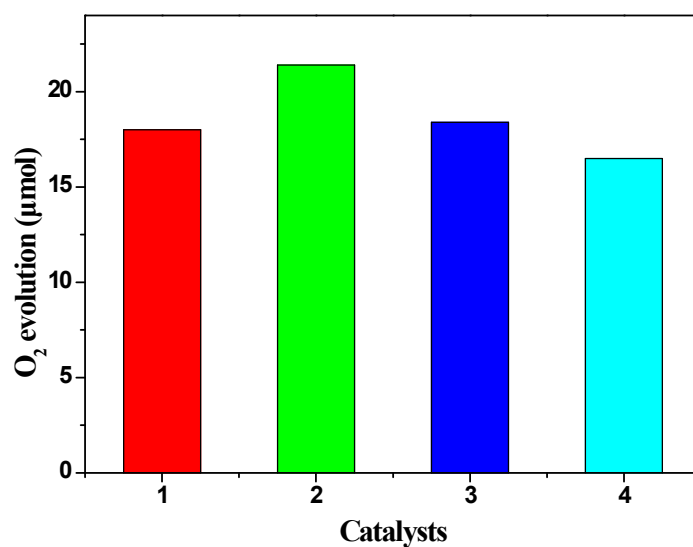

**Fig. S16** Photocatalytic oxygen evolution with the artificial photosynthetic system composed of  $\text{BiVO}_4$  (50 mg) and Fe complex **1** (100  $\mu\text{M}$ ), **2** (50  $\mu\text{M}$ ), **3** (100  $\mu\text{M}$ ), **4** (100  $\mu\text{M}$ ) in acetate buffer (0.2 M, pH 4.0) containing  $\text{NaIO}_3$  (5 mM) under visible light irradiation ( $\lambda = 420 \text{ nm}$ ), reaction time is 3 h.

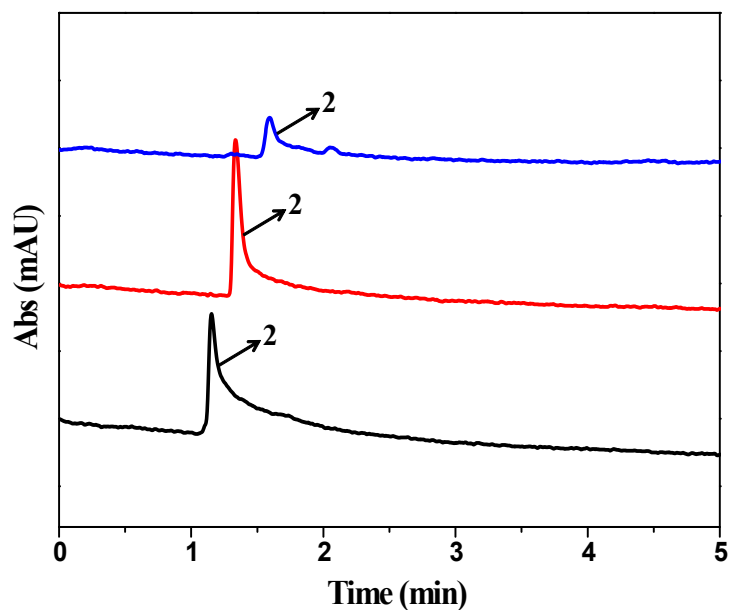

**Fig. S17** An electropherogram for **2** (250  $\mu\text{M}$ ). Black line: 250  $\mu\text{M}$  of **2** in a 20 mM acetate buffer (pH = 4.0). Red line: 250  $\mu\text{M}$  of **2** in a 20 mM acetate buffer (pH = 4.0) containing  $\text{NaIO}_3$  (10.0 mM) and 50 mg  $\text{BiVO}_4$  (filter removal before detection), before illumination. Blue line: 250  $\mu\text{M}$  of **2** in a 20 mM acetate buffer (pH = 4.0) containing  $\text{NaIO}_3$  (10.0 mM) and 50 mg  $\text{BiVO}_4$  (filter removal before detection) after 3 h of illumination. Experimental conditions for capillary electrophoresis: Fused-silica capillaries (75 $\mu\text{m}$  i.d., 365 $\mu\text{m}$  o.d., Hebei Yongnian Factory, China) with total length of 50.2 cm and effective length of 10 cm were used. The detection wavelength was set at 214 nm. The running buffer for CE separation was 20 mM sodium borate buffer (pH 10.0). The separation voltage was set at -20 kV. The sample was injected into the capillary (0.5 psi, 3 s).

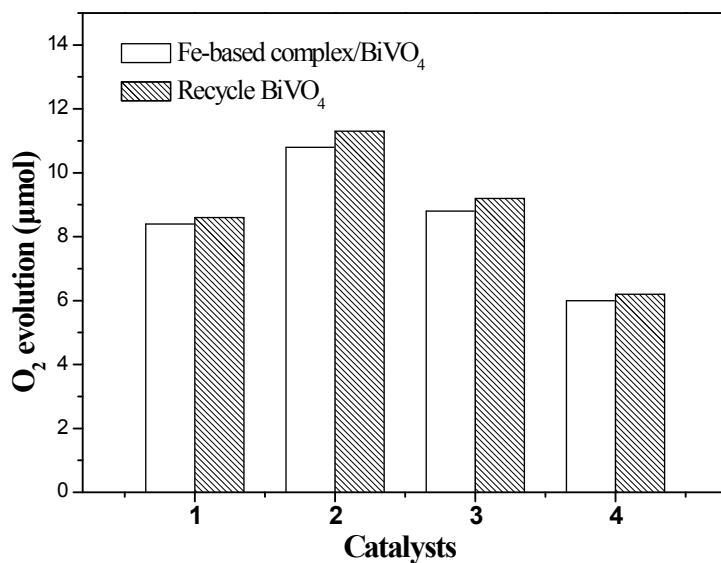

**Fig. S18** Oxygen evolution activity of Fe-based complex (complex **1**, **2**, **3** and **4**) / $\text{BiVO}_4$  and recycle  $\text{BiVO}_4$  after reaction.

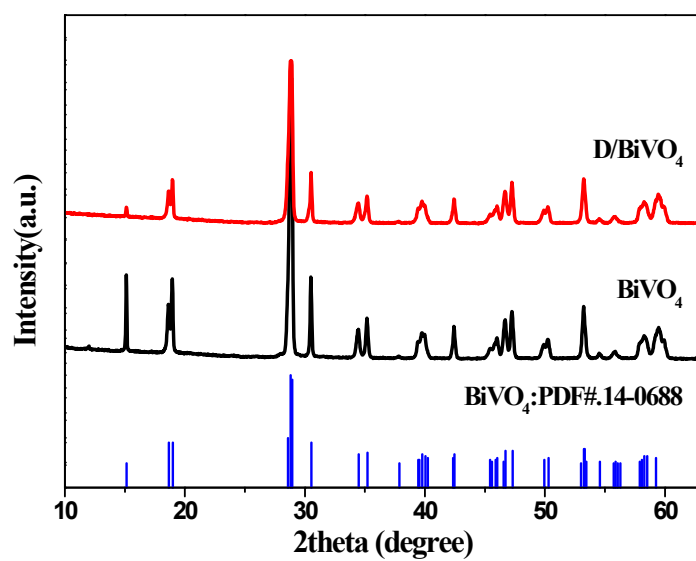

**Fig. S19** The powder X-ray diffraction (XRD) spectra of pure BiVO<sub>4</sub> and composite D/BiVO<sub>4</sub>.

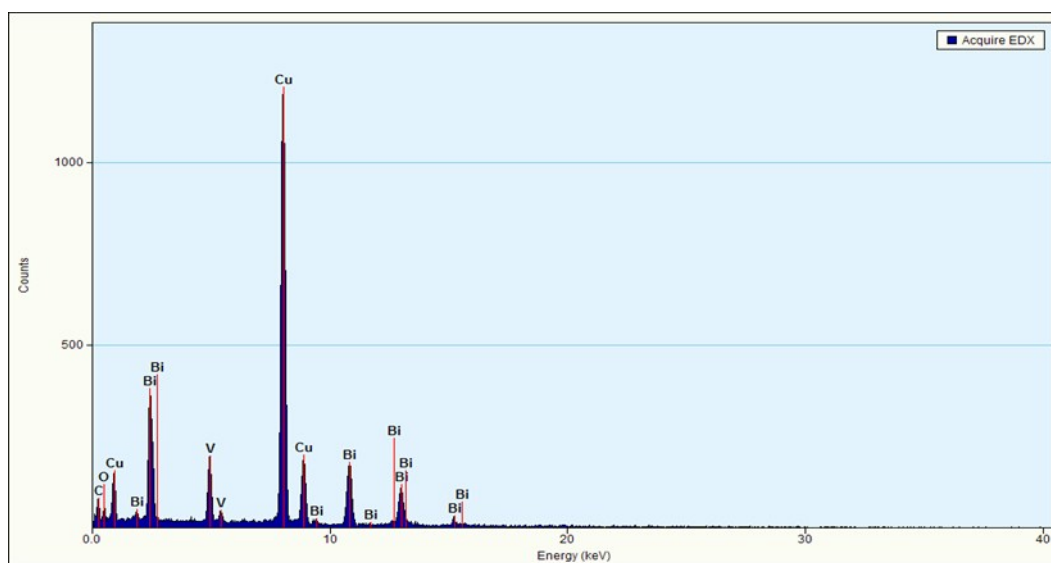

**Fig. S20** EDX analysis of BiVO<sub>4</sub> before the reaction.

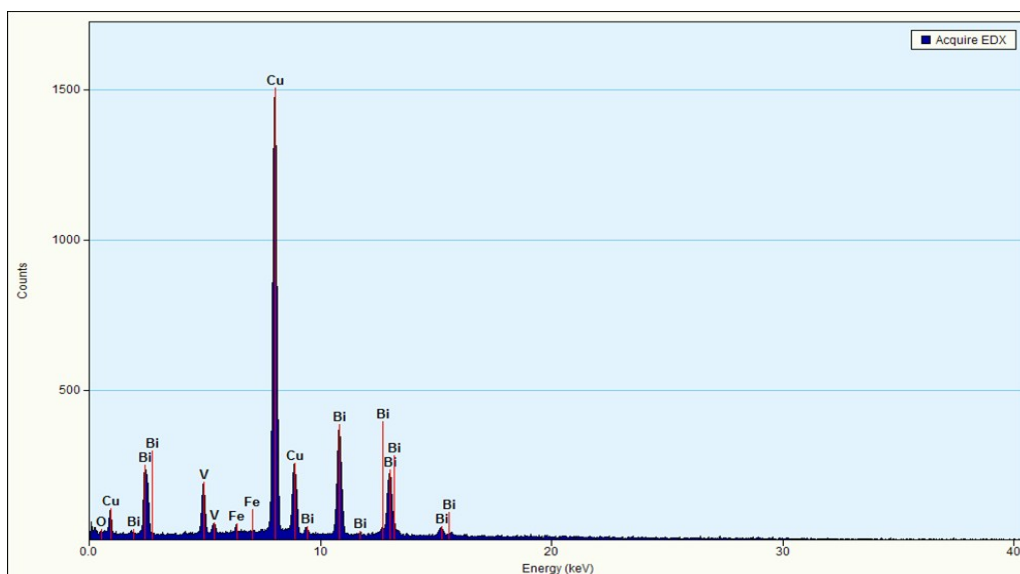

**Fig. S21** EDX analysis of composite D/BiVO<sub>4</sub>.

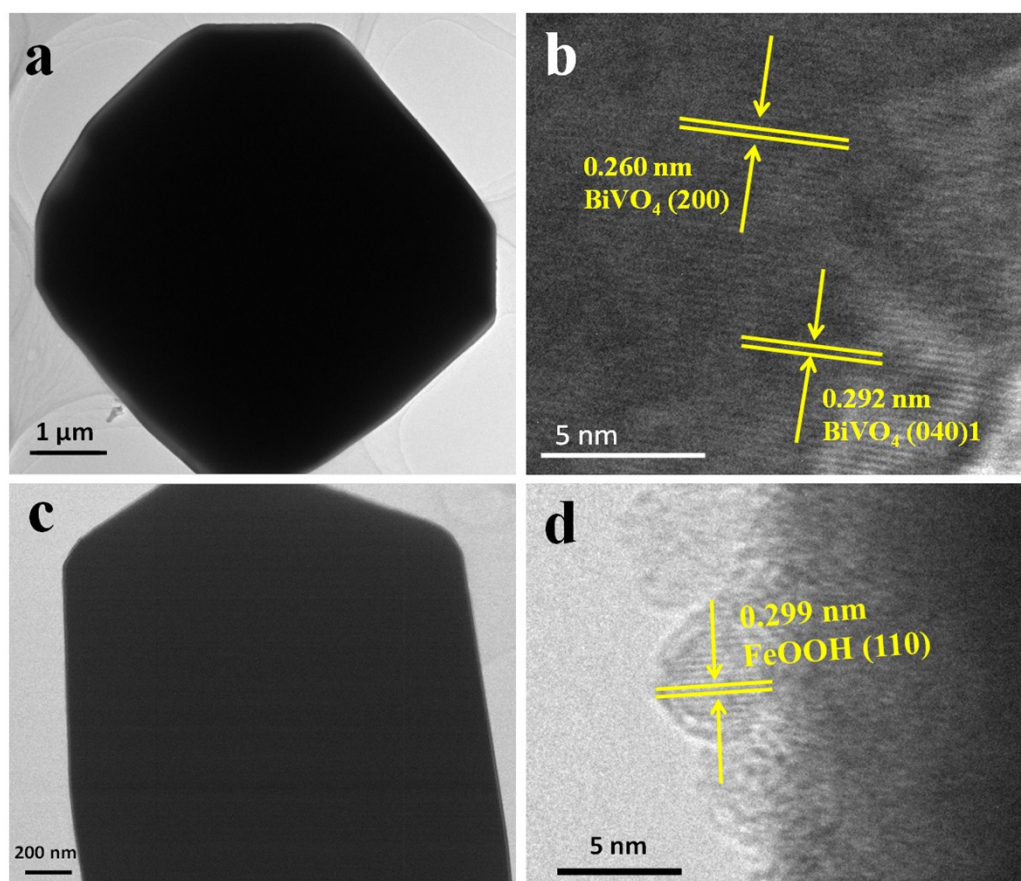

**Fig. S22** Transmission electron microscopy (TEM) images of pure BiVO<sub>4</sub> (a) and composite D/BiVO<sub>4</sub> (c). High-resolution transmission electron microscopy (HRTEM) images of pure BiVO<sub>4</sub> (b) and composite D/BiVO<sub>4</sub> (d).



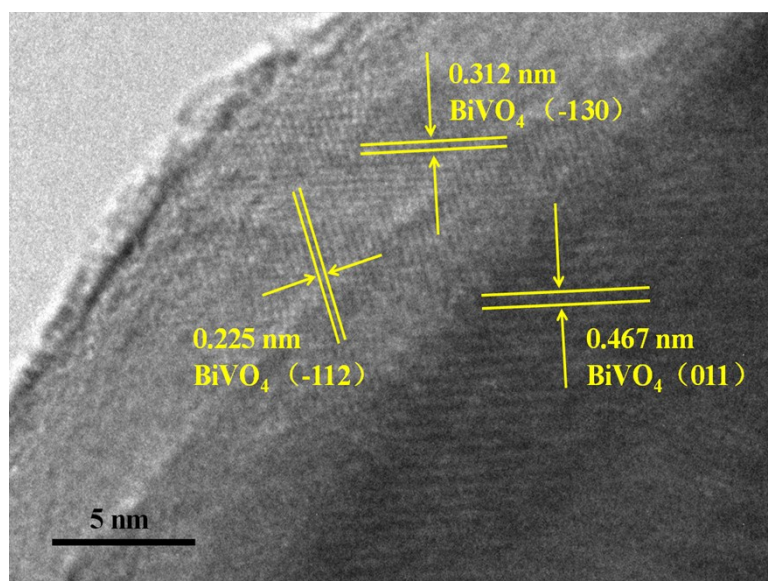

**Fig. S23** High-resolution transmission electron microscopy (HRTEM) images of composite D/BiVO<sub>4</sub>.

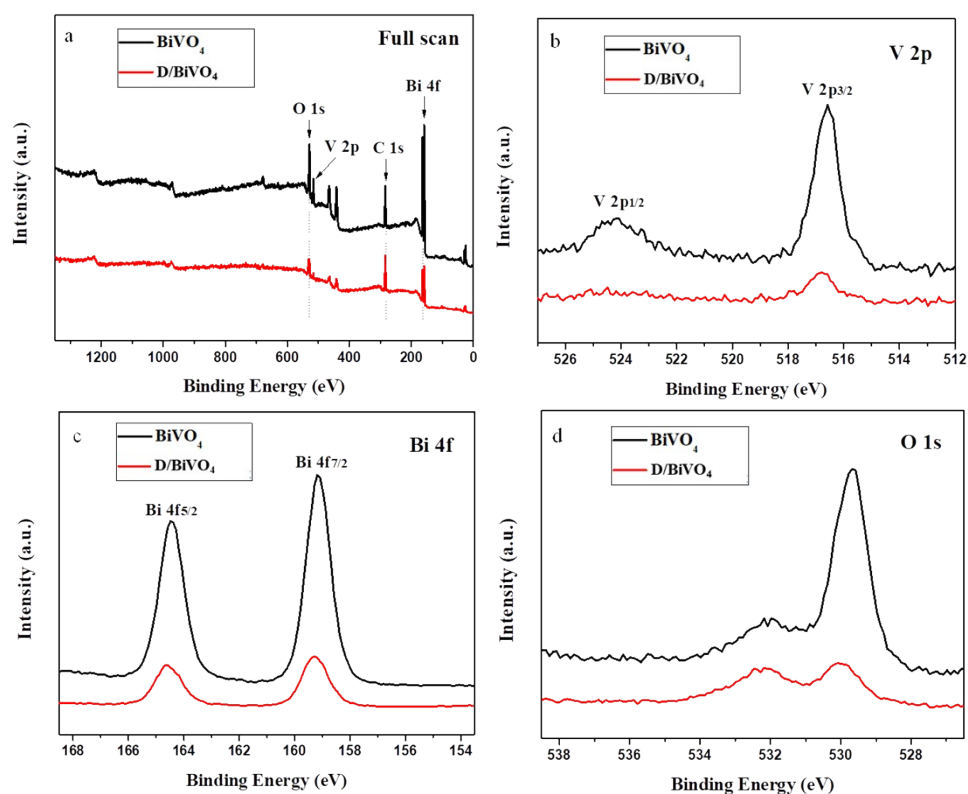

**Fig. S24** The full scan of X-ray photoelectron spectroscopy (XPS) spectra of pure BiVO<sub>4</sub>, recovered BiVO<sub>4</sub> (D/BiVO<sub>4</sub>) and [Fe<sub>2</sub>(TPA)<sub>2</sub>(μ-O)Cl<sub>2</sub>]Cl<sub>2</sub>.

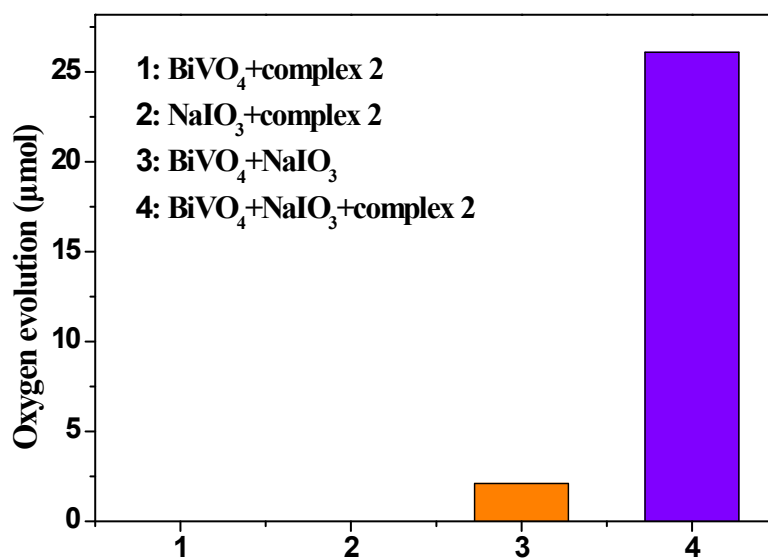

**Fig. S25** The amount of oxygen evolution in the photocatalytic system. 1: 50.0 mg BiVO<sub>4</sub>, 25 μmol complex 2; 2: 5.0 mM NaIO<sub>3</sub>, 25 μmol complex 2; 3: 50.0 mg BiVO<sub>4</sub>, 5.0 mM NaIO<sub>3</sub>; 4: 50.0 mg BiVO<sub>4</sub>, 5.0 mM NaIO<sub>3</sub>, 25 μmol complex 2, in acetate buffer (pH 4.0), reaction time is 3 h.

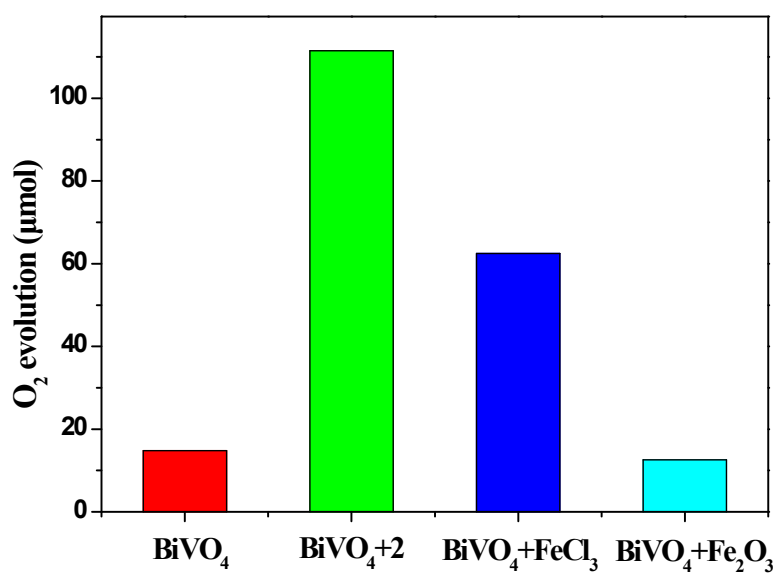

**Fig. S26** The amount of oxygen evolution in the photocatalytic system using different iron sources, reaction time is 20 h. Conditions: 100 mW/cm<sup>2</sup> under illumination at 420 nm; keep the same cocatalyst concentration (25 μM), 50.0 mg BiVO<sub>4</sub>, 10.0 mM NaIO<sub>3</sub>;

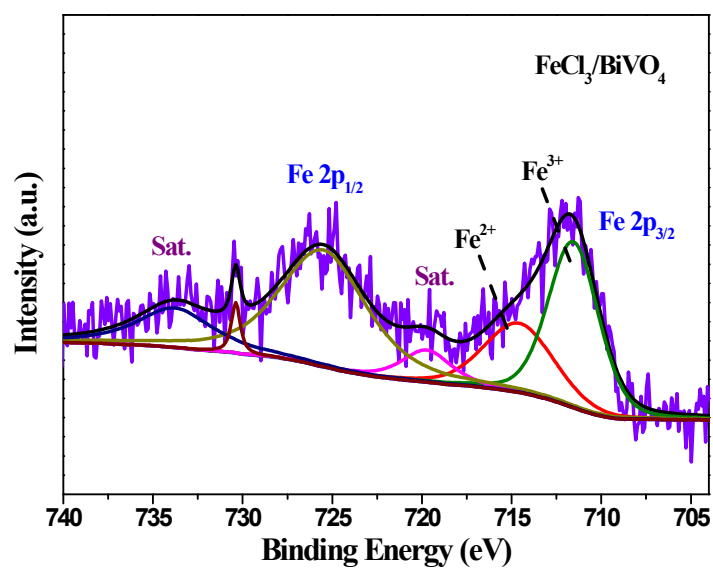

**Fig. S27** The Fe 2p of X-ray photoelectron spectroscopy (XPS) spectra of recovered FeCl<sub>3</sub>/BiVO<sub>4</sub> after water oxidation.

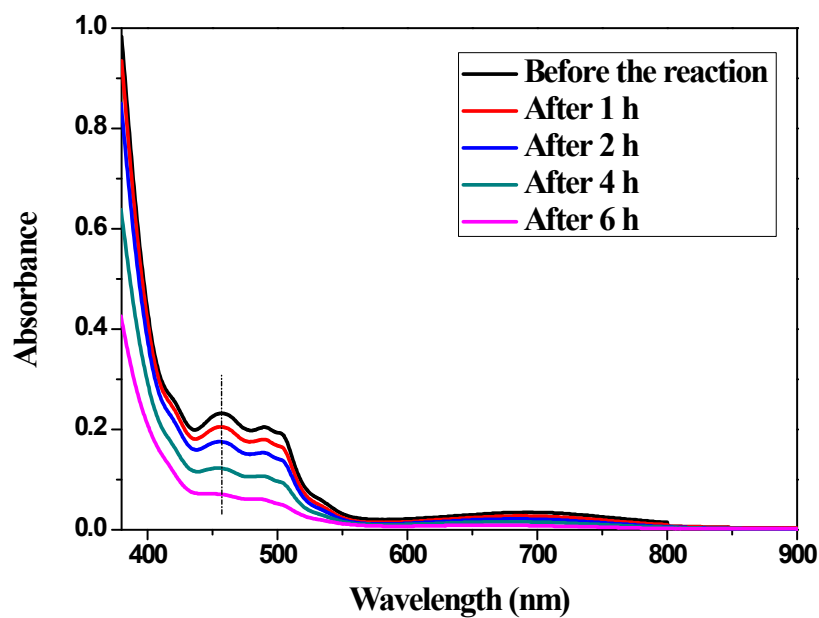

**Fig. S28** Decomposition of complex 2 (250 μM) during the reaction monitored by UV-vis spectra.

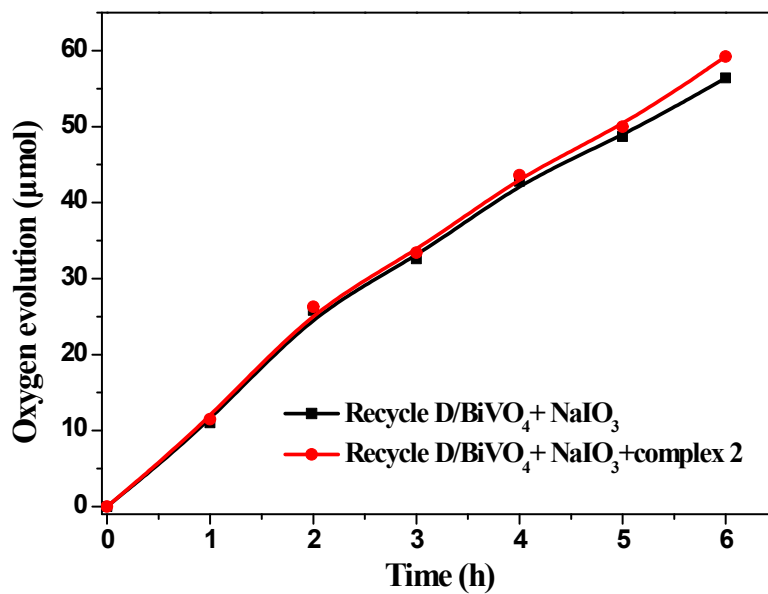

**Fig. S29** Kinetics of oxygen evolution in the photocatalytic system of recycle D/BiVO<sub>4</sub> (without complex **2**) and D/BiVO<sub>4</sub> (with 25μM complex **2**) in acetate buffer (pH 4.0) containing NaIO<sub>3</sub> (5 mM) and BiVO<sub>4</sub> (50 mg).

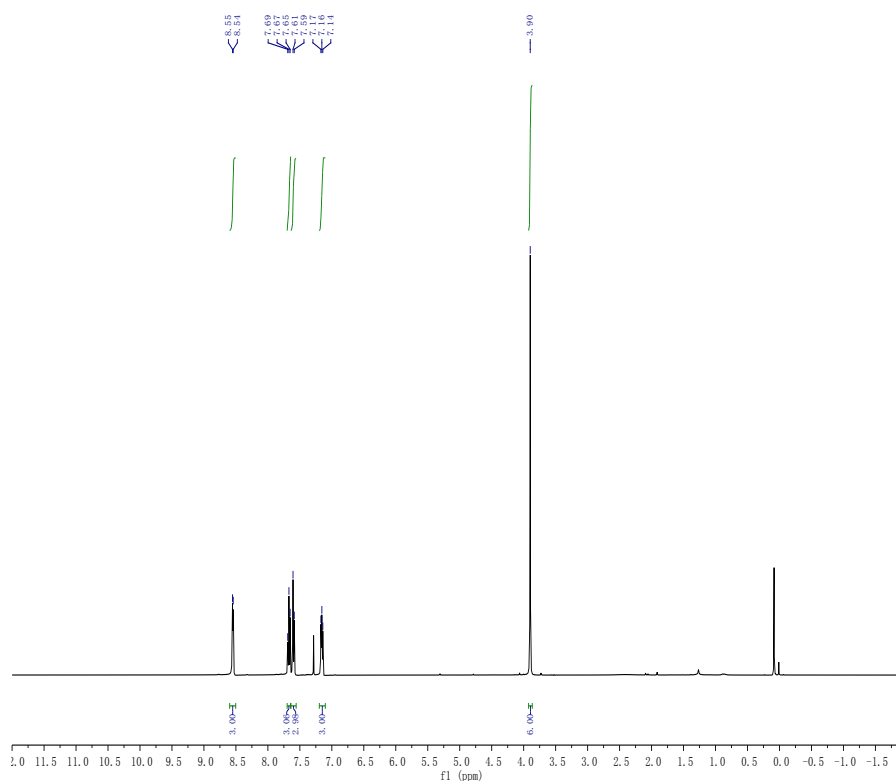

**Fig. S30** <sup>1</sup>H NMR of TPA, <sup>1</sup>H NMR (400 MHz, CDCl<sub>3</sub>) δ 8.55 (d, J = 4.6 Hz, 3H), 7.67 (t, J = 7.6 Hz, 3H), 7.60 (d, J = 7.7 Hz, 3H), 7.20 – 7.10 (m, 3H), 3.90 (s, 6H).

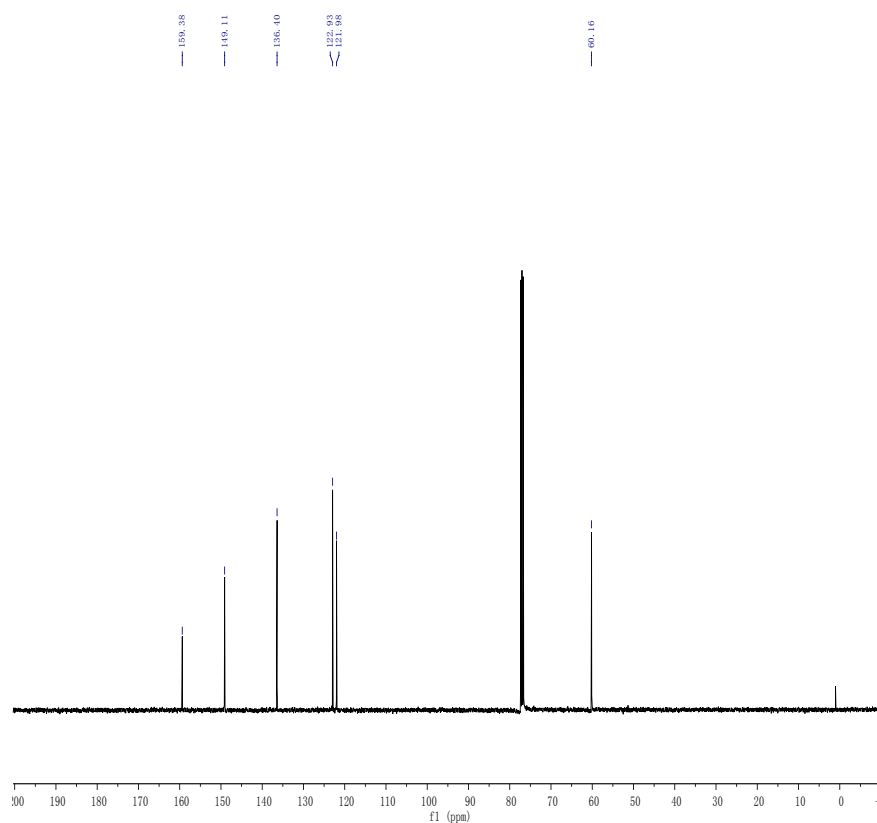

**Fig. S31**  $^{13}\text{C}$  NMR of TPA,  $^{13}\text{C}$  NMR (101 MHz,  $\text{CDCl}_3$ )  $\delta$  159.38 (s), 149.11 (s), 136.40 (s), 122.93 (s), 121.98 (s), 60.16 (s).

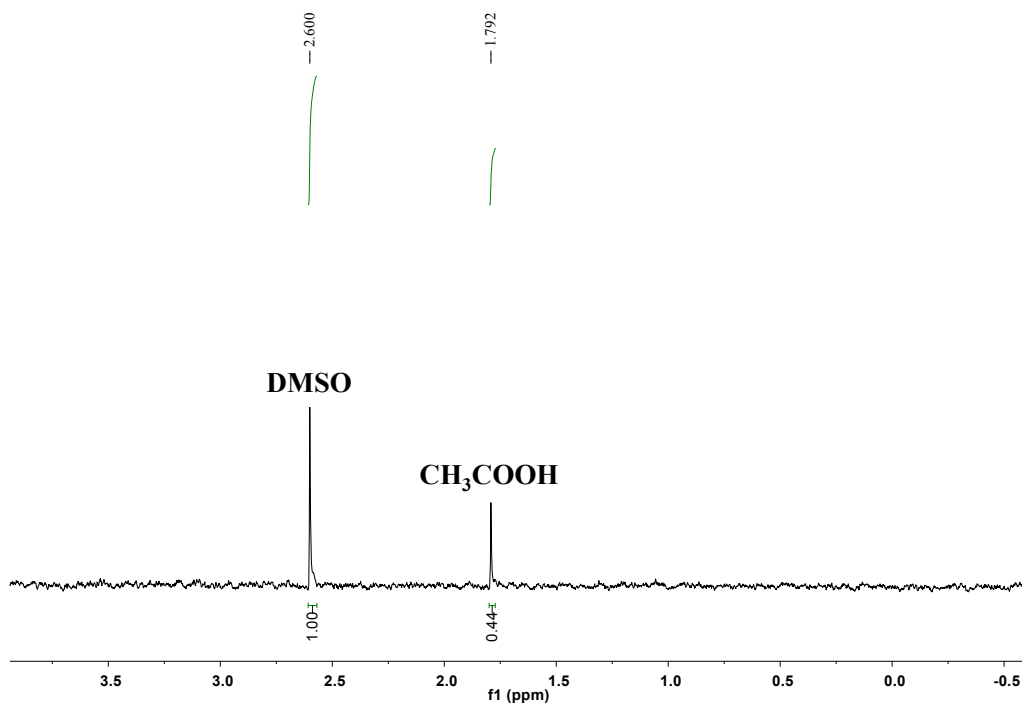

**Fig. S32** The  $^1\text{H}$  NMR spectrum of the filtered mixture of TPA (1.0 mM),  $\text{BiVO}_4$  (50 mg), and  $\text{NaIO}_3$  (5.0 mM) in  $\text{D}_2\text{O}$  after irradiation ( $\lambda = 420$  nm) for 20 h.

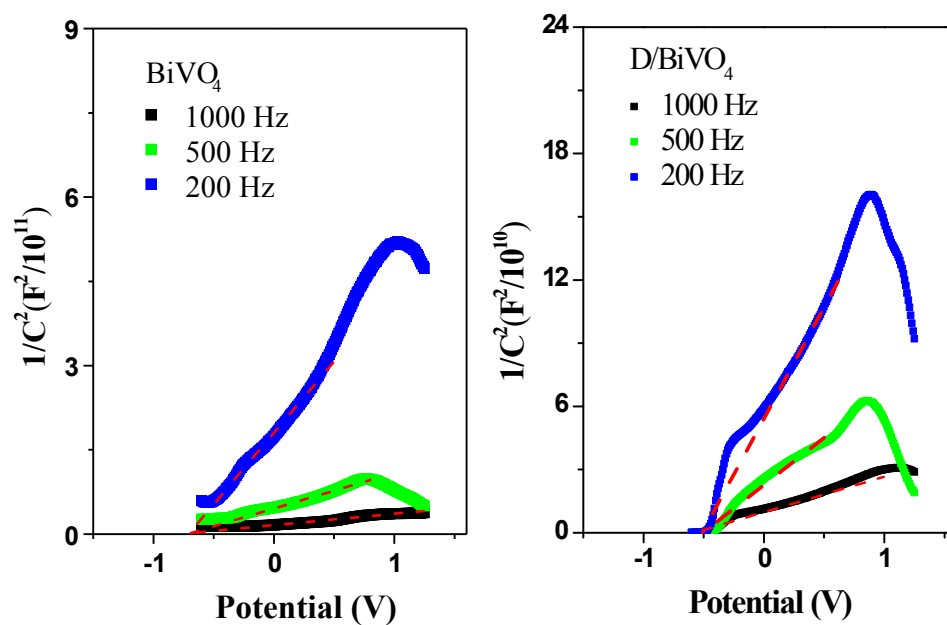

Fig. S33 Mott-Schottky plots of  $\text{BiVO}_4$  (left) and  $\text{D/BiVO}_4$  (right).

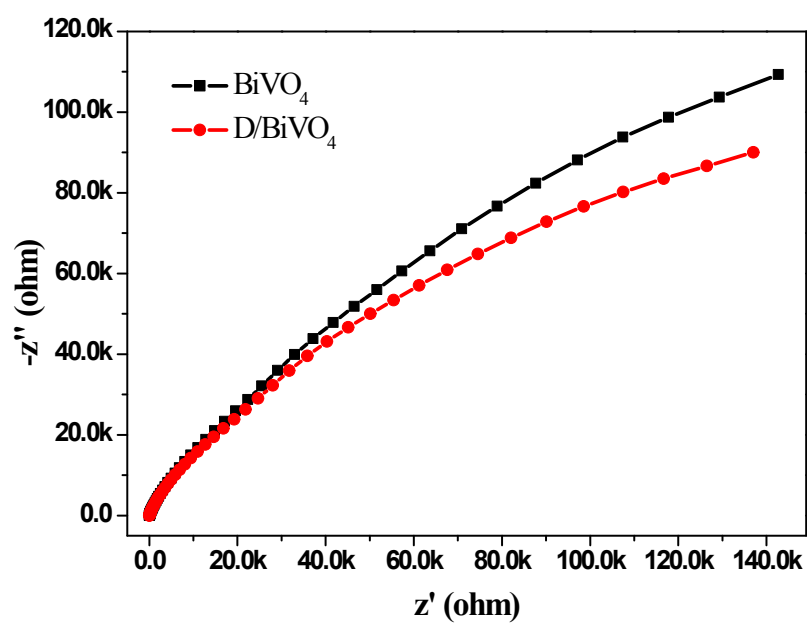

Fig. S34 Electrochemical impedance spectroscopy (EIS) for  $\text{BiVO}_4$  and  $\text{D/BiVO}_4$ .

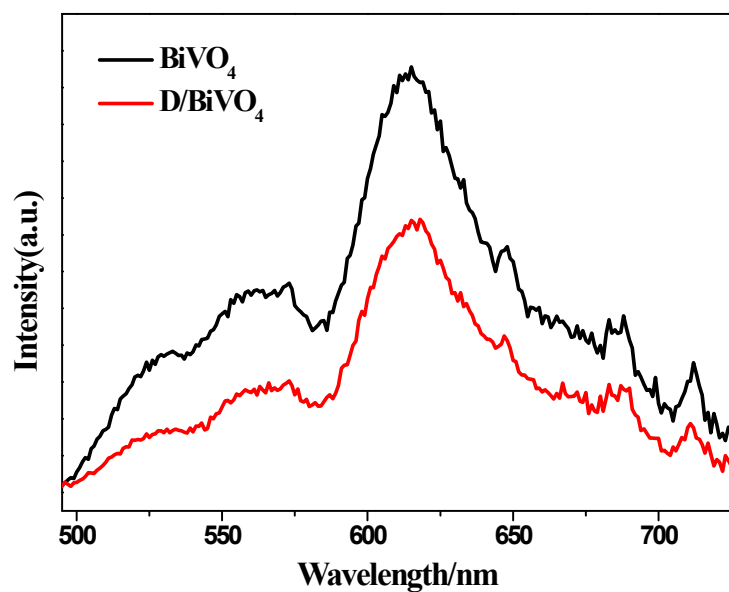

**Fig. S35** PL spectra of pure  $\text{BiVO}_4$  and  $\text{D/BiVO}_4$ .

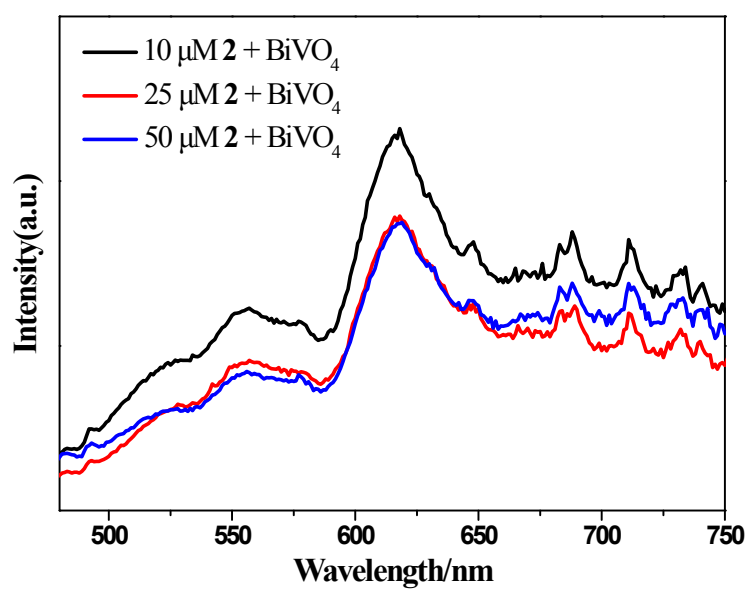

**Fig. S36** Photoluminescence (PL) emission spectra of the recovered  $\text{BiVO}_4$  prepared by the photodeposition of different concentrations (10  $\mu\text{M}$ , 25  $\mu\text{M}$ , 50  $\mu\text{M}$ ) of **2**.

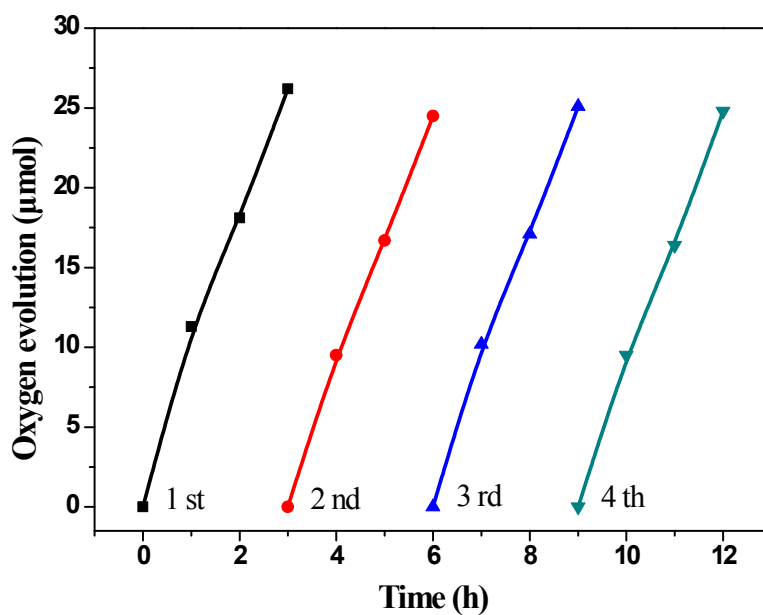

**Fig. S37** Recycling photocatalytic test of composite D/BiVO<sub>4</sub> (50 mg) with addition of NaIO<sub>3</sub> in 0.2 M acetate buffer solution buffer solution at pH 4.0; all reaction solutions were irradiated by LEDs ( $\lambda = 420$  nm, 100 mW cm<sup>-2</sup>); total reaction volume 15 mL; vigorous agitation using a magnetic stirrer.

**Table S1** A comparison of water oxidation performance of different iron complexes under optimal conditions.<sup>a</sup>

| Cocatalyst | Concentration ( $\mu$ M) | O <sub>2</sub> evolution rate ( $\mu$ mol h <sup>-1</sup> ) |
|------------|--------------------------|-------------------------------------------------------------|
| -          | 0                        | 1.1                                                         |
| 1          | 50                       | 8.4                                                         |
| 2          | 25                       | 10.8                                                        |
| 3          | 50                       | 8.8                                                         |
| 4          | 50                       | 6.0                                                         |

<sup>a</sup>Conditions: BiVO<sub>4</sub> (50 mg), NaIO<sub>3</sub> (5 mM), acetate buffer (pH 4.0, 0.2 M); keep the same iron concentration (50  $\mu$ M); reaction time is 1 h; all reaction systems were irradiated by LED lamp ( $\lambda = 420$  nm).



**Table S2.** Water oxidation catalyzed by different catalytic systems.

| Description                 | Approach             | Time/h | n(O <sub>2</sub> )/μmol | Stability of molecular catalyst | Ref.      |
|-----------------------------|----------------------|--------|-------------------------|---------------------------------|-----------|
| <b>2</b> /BiVO <sub>4</sub> | Photocatalysis       | 2      | 17.8                    | Decomposed into FeOOH           | This work |
| <b>FeP</b> /WO <sub>3</sub> | Photoelectrochemical | 2      | 3.7±0.4                 | Stable                          | 5         |

**Table S3** Concentration of Fe detected by ICP-AES.

| Samples <sup>a</sup> | Concentration of complex <b>2</b> (μM) | Concentration of Fe (mg/L) <sup>b</sup> |
|----------------------|----------------------------------------|-----------------------------------------|
| 1                    | 10                                     | 2.05                                    |
| 2                    | 25                                     | 3.09                                    |
| 3                    | 50                                     | 6.60                                    |

<sup>a</sup> The method for the preparation of samples: The acetate buffer solution containing complex **2**, NaIO<sub>3</sub> and BiVO<sub>4</sub> was illuminated 20 h; conditions: 50 mg BiVO<sub>4</sub>, 5 mM NaIO<sub>3</sub>, and 420 nm LED lamp, pH 4.0 acetate buffer; total reaction volume 15 mL; vigorous agitation using a magnetic stirrer. The recycled BiVO<sub>4</sub> was washed with ultrapure water and dried under vacuum at 40 °C for 24 hours. Then, 100 mg recycled BiVO<sub>4</sub> was dissolved in 10 mL aqueous hydrochloric acid (4 M) for the ICP-AES analysis. <sup>b</sup>The concentration of Fe represents the thickness of FeOOH on the surface of BiVO<sub>4</sub>.

## References

1. Y. Liu, R. Xiang, X. Du, Y. Ding and B. Ma, *Chem. Commun.*, 2014, **50**, 12779.
2. Y. Hitomi, K. Hiramatsu, K. Arakawa, T. Takeyasu, M. Hata and M. Kodera, *Dalton Trans.*, 2013, **42**, 12878.
3. Q. Li, T. A. van den Berg, B. L. Feringa and G. Roelfes, *Dalton Trans.*, 2010, **39**, 8012.
4. M. Lubben, E. C. Wilkinson, B. Feringa, and L. Que, Jr., *Angew. Chem., Int. Ed.*, 1995, **34**, 1512.
5. T. E. Rosser, M. A. Gross, Y.-H. Lai and E. Reisner, *Chem. Sci.*, 2016, 7, 4024.
